# Supplementary material
Source: publisher figshare collection journal article supplement (https://acs.figshare.com/ndownloader/files/5719563)
Supplement: Supplementary file 1 [file 5719563]

# Stereo representation of starting coordinates and theoretical structures

Supplementary material to Spackova, N; Berger, I.; Sponer, J.

*Structural dynamics and cation interactions of DNA quadruplex molecules containing mixed guanine/cytosine quartets revealed by large-scale MD simulations*

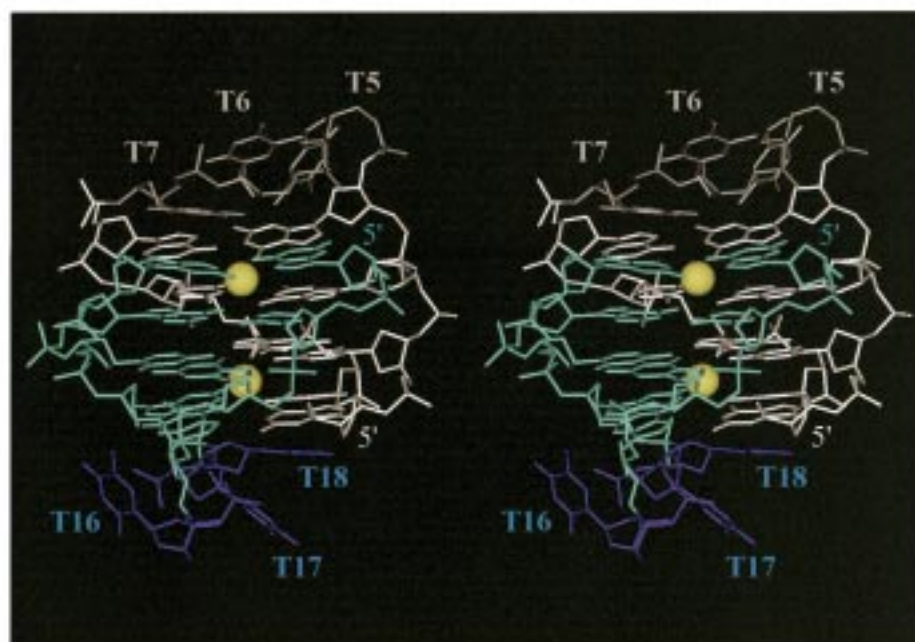

d(GCGGTTTGCGG)<sub>2</sub>; NaCl, NMR structure (Ref. 9a)

Chains are in blue and white, corresp. thymine loops are colored dark blue and gray, respectively.  
Sodium ions are shown as larger spheres in yellow.

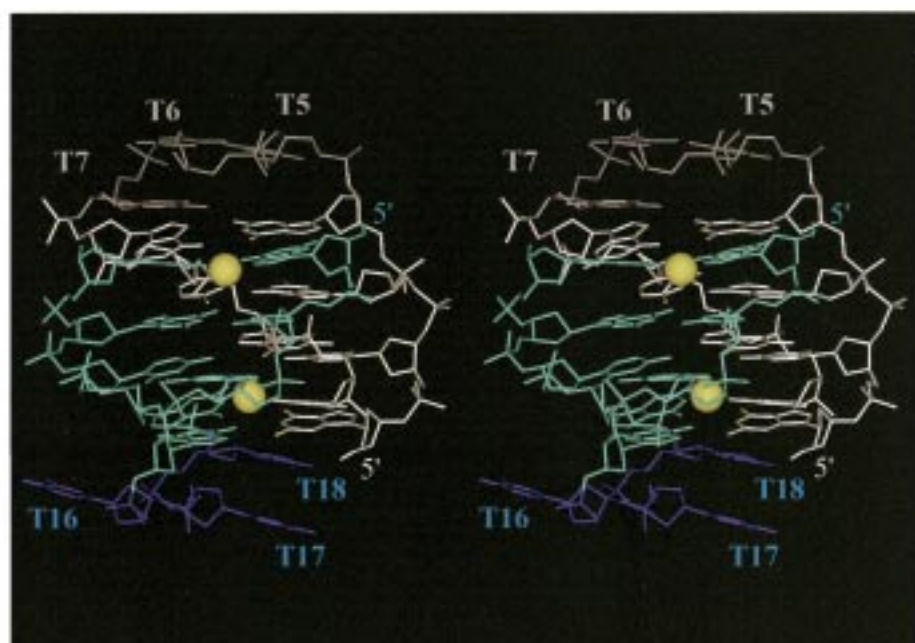

Simulation A7L (see Table I)  
Averaged structure 1.5-2.5ns,  
color coding as above.

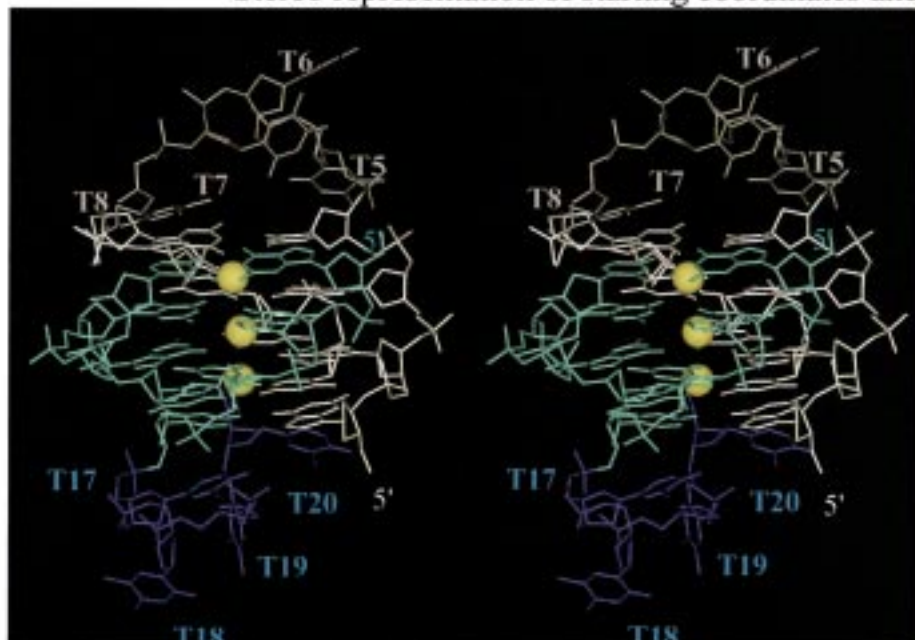

d(GGGCTTTTGGGC)<sub>2</sub>; NaCl,  
NMR structure (Ref. 9b)

Chains are in blue and white,  
corresp. thymine loops are colored  
dark blue and gray, respectively.  
Sodium ions are shown as larger  
spheres in yellow.

Note T6 and T18 residues projecting  
away from the molecule (see text).

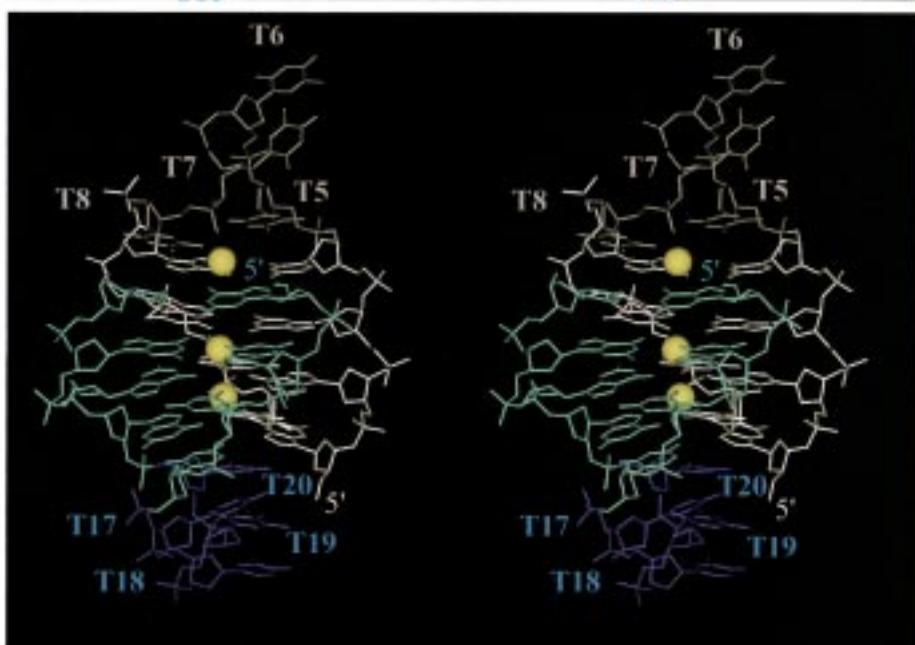

Simulation B5L (see Table I).  
Average structure 4-5ns,  
color coding as above.

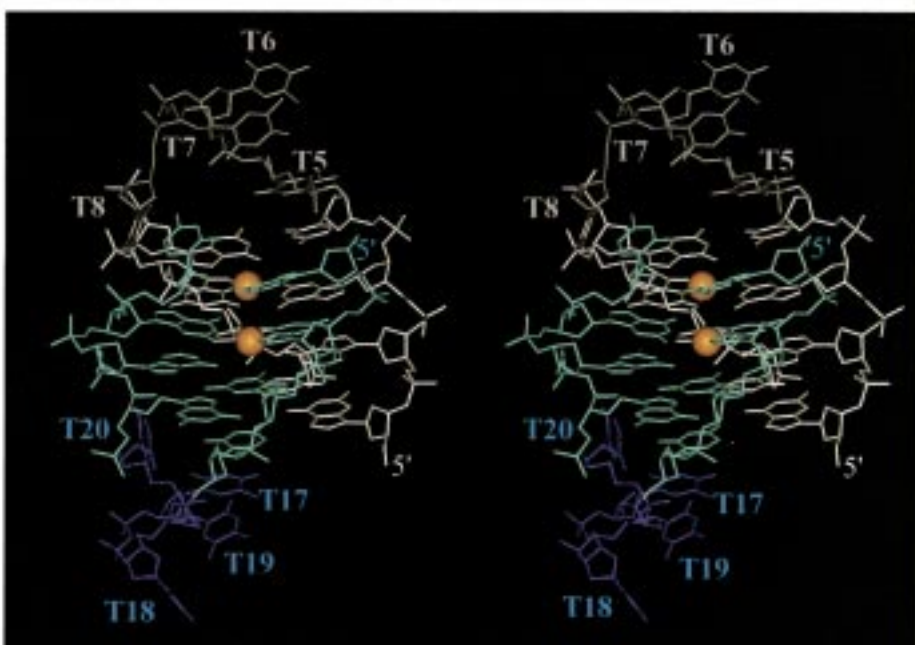

Simulation B6L (see Table I).  
Average structure 4-5ns.  
Color coding as above, except  
potassium ions that are drawn  
as larger spheres in orange.



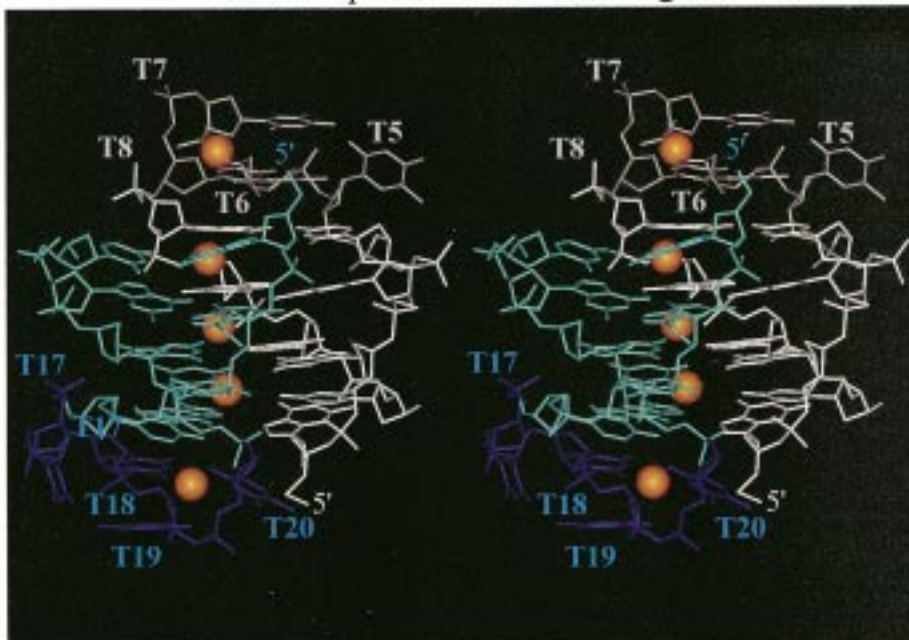

d(GGGCTTTTGGGC)<sub>2</sub>; KCl,  
NMR structure (Ref. 9c)

Chains are in blue and white,  
corresp. thymine loops are colored  
dark blue and gray, respectively.  
Potassium ions are shown as larger  
spheres in orange.

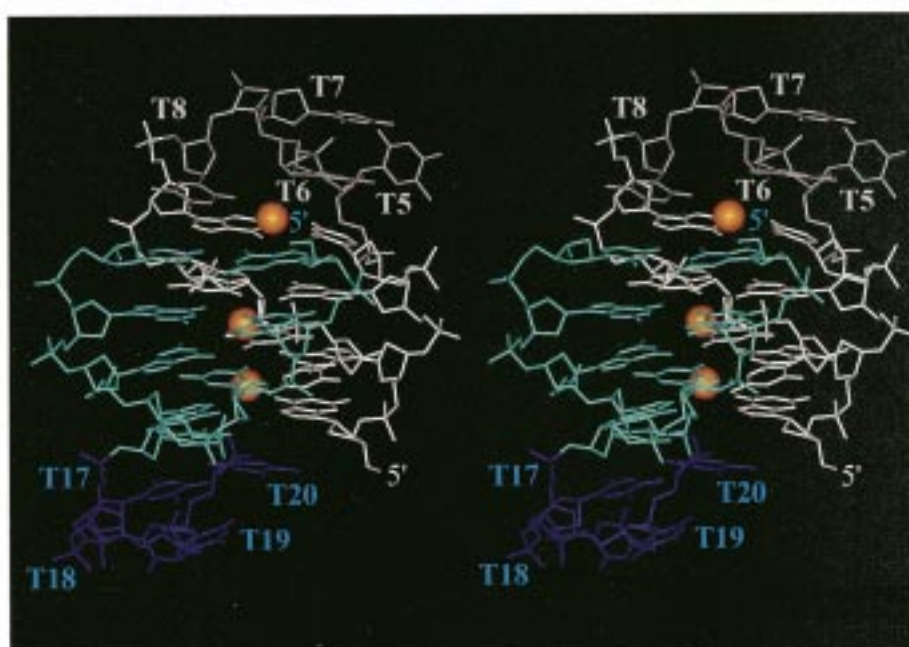

Simulation B3L (see Table I)  
Averaged structure 3.9-4.9ns,  
color coding as above.

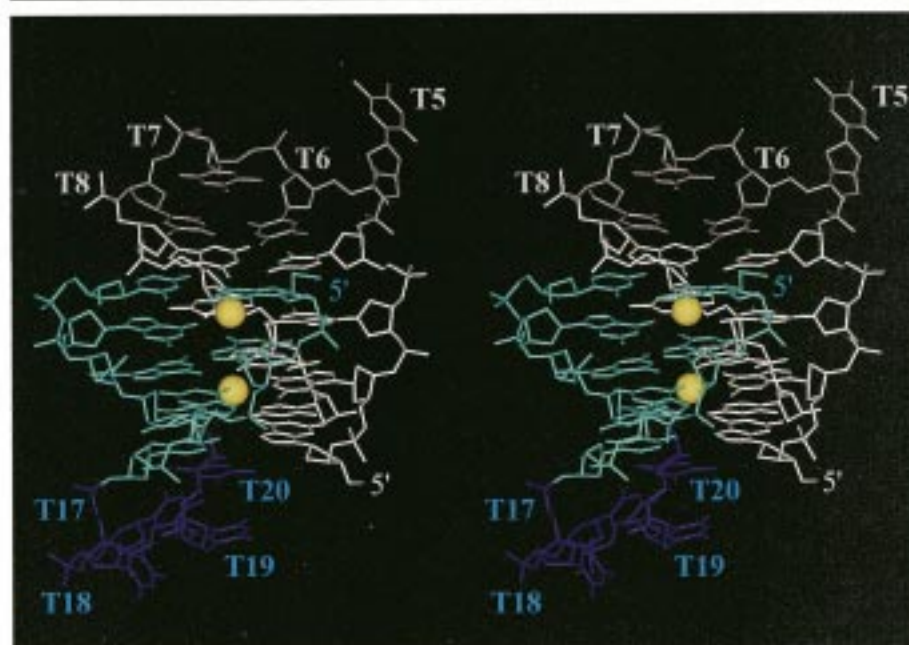

Simulation B4L (see Table I)  
Averaged structure 3-4ns.  
Color coding as above, except for  
sodium ions that are shown as larger  
spheres in yellow.

# Stereo representation of starting coordinates and theoretical structures

d(GGGCTTTTGGGC)<sub>2</sub>; KCl, NMR starting structure (Ref. 9c)

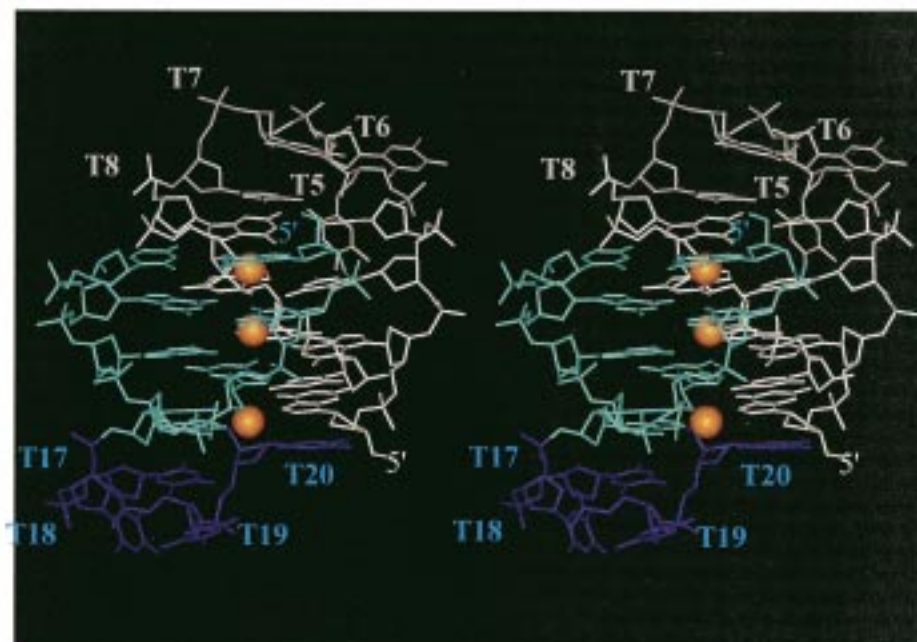

Simulation B7L (see Table I)  
Averaged structure 11-12ns,  
color coding as before.  
Modified Cornell *et al.* force field.

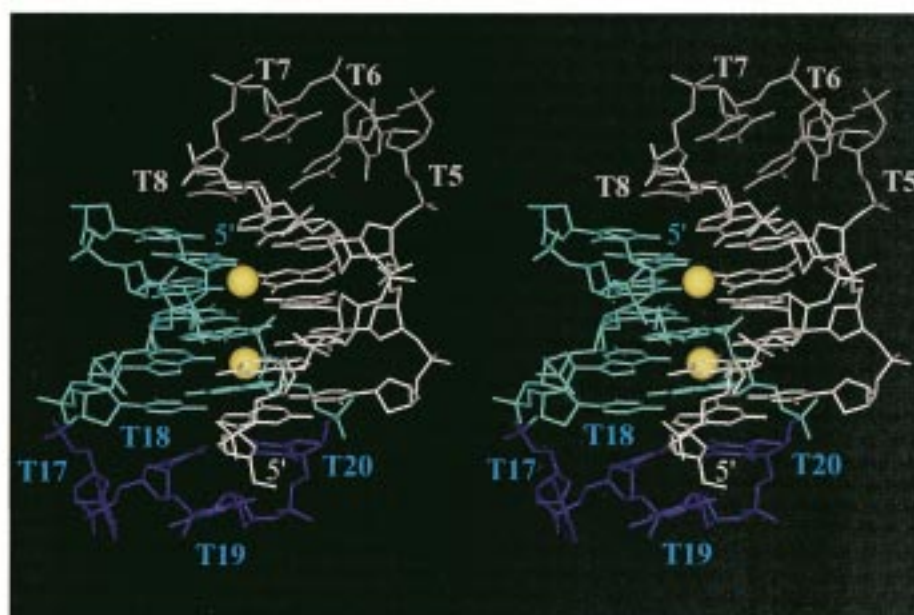

Simulation B8L (see Table I)  
Averaged structure 9-10ns,  
color coding as above except for  
sodium ions drawn in yellow.  
Force field as above.



d(GGGCTTTTGGGC)<sub>2</sub>; KCl, NMR starting structure (Ref. 9c)

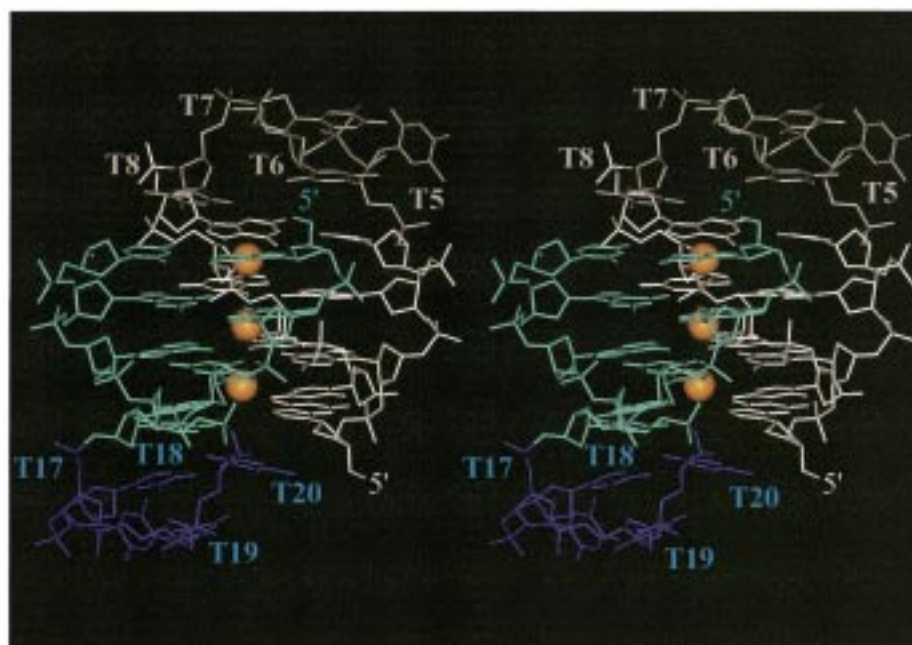

Simulation B9L (see Table I)

Averaged structure 4-5ns, color coding as before.  
Same as B7L; with modified equilibration protocol  
and modified Cornell *et al.* force field.

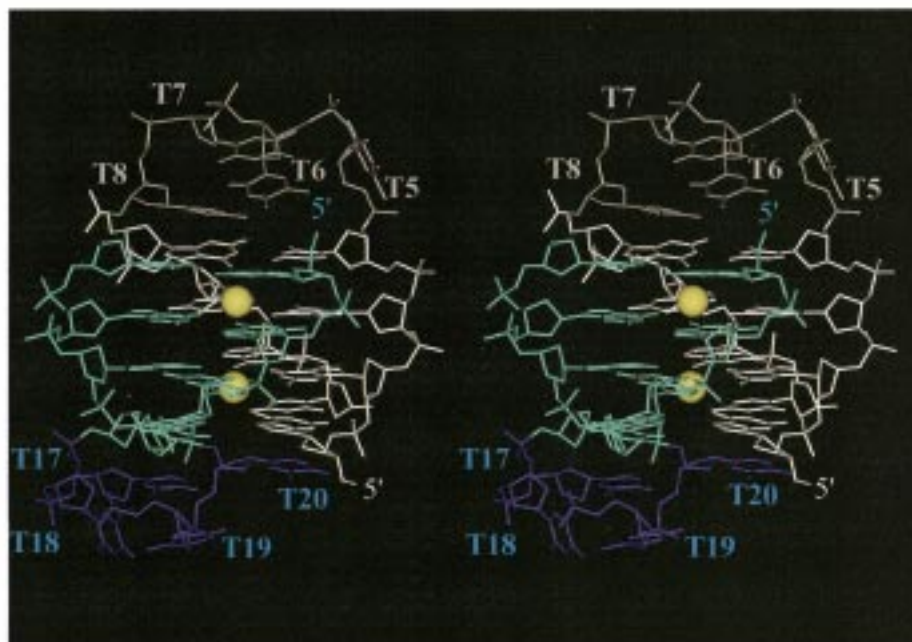

Simulation B11L (see Table I)

Averaged structure 4-5ns,  
color coding as above except for  
sodium ions drawn in yellow.  
High salt simulation.

# Stereo representation of starting coordinates and theoretical structures

d(GGGCTTTTGGGC)<sub>2</sub>; KCl, NMR starting structure (Ref. 9c)

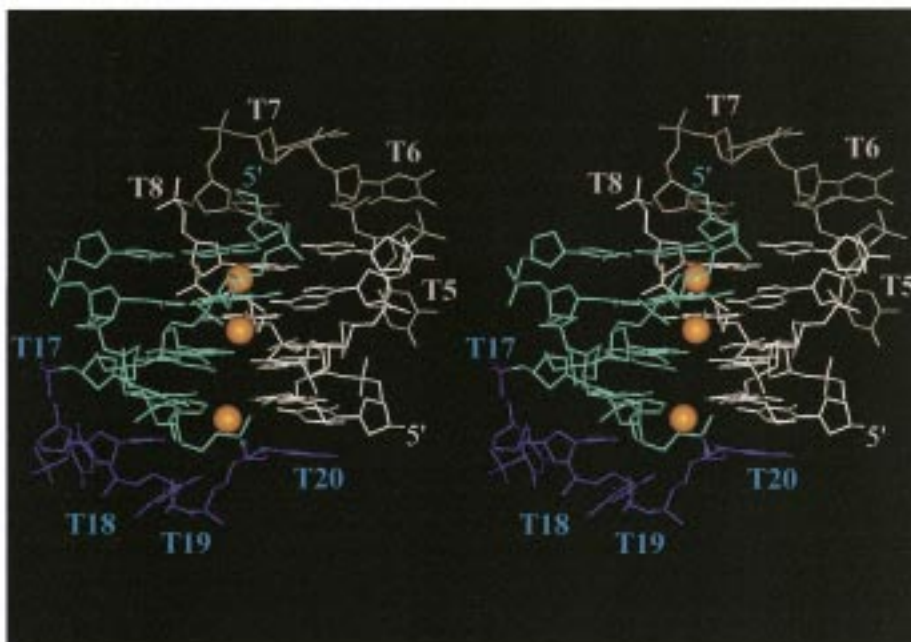

Snapshot from simulation B7L at 10ns,  
starting geometry for simulation B10L (below).  
Color coding as before.

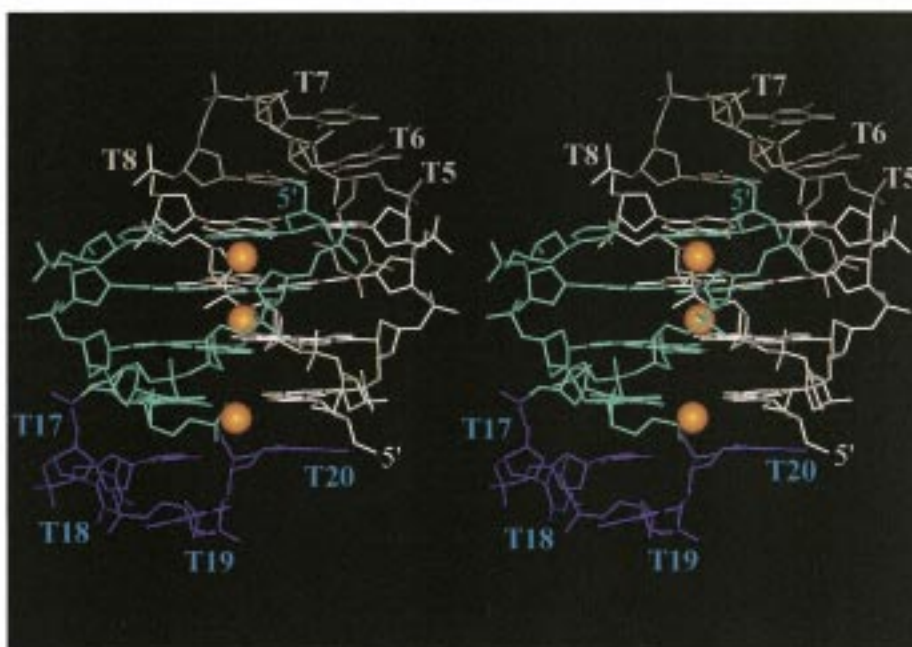

Simulation B10L (see Table I)  
Averaged structure 2.5-3ns.  
Modified Cornell *et al.* force field.



Stereo representation of representative loop geometries and ion-loop interactions in simulated structures based on d(GGGCTTTTGGGC)2 NMR starting coordinates (Ref. 9c)

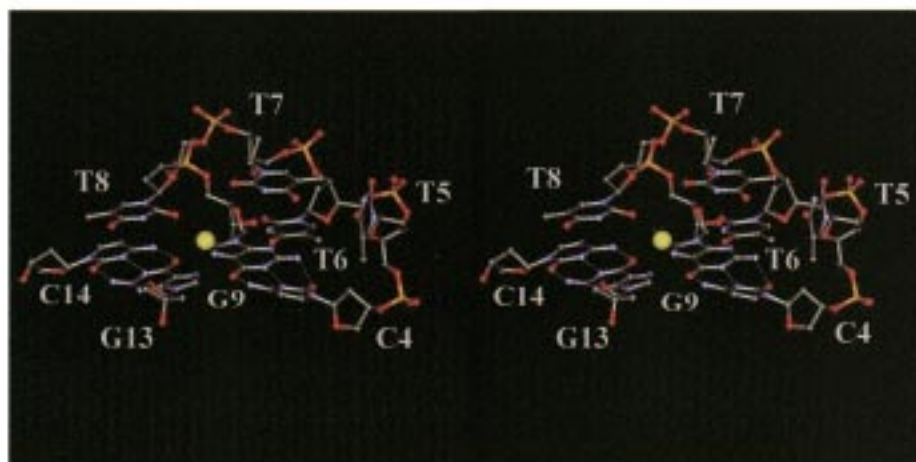

Ion - loop interaction A  
Residues are colored by atom type, Sodium is drawn as a larger sphere in yellow.

The ion resides above the mixed GCGC quartet layer that adopts a sheared conformation. Note stacked thymines T6 and T7. Dashed lines indicate hydrogen bond interactions..

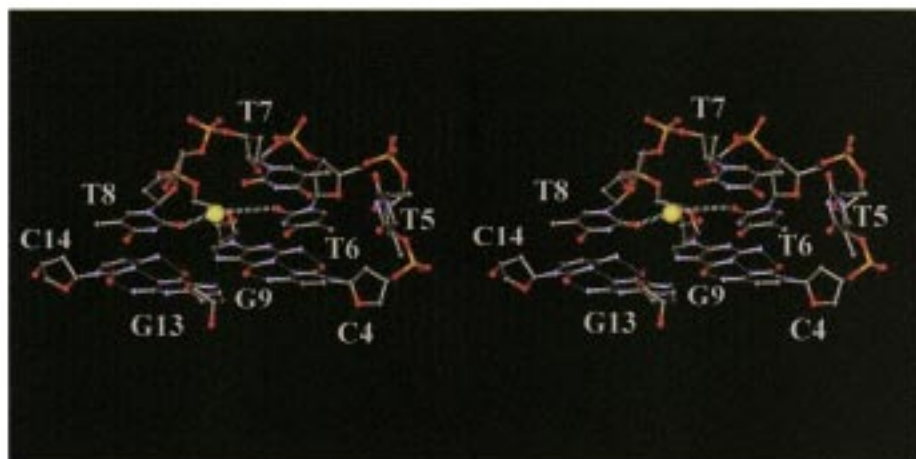

Ion - loop interaction B  
Color coding as above.

The ion is coordinated to residues thymines T6 and T8, interacting with O2 keto oxygen atoms (thick dashed lines).

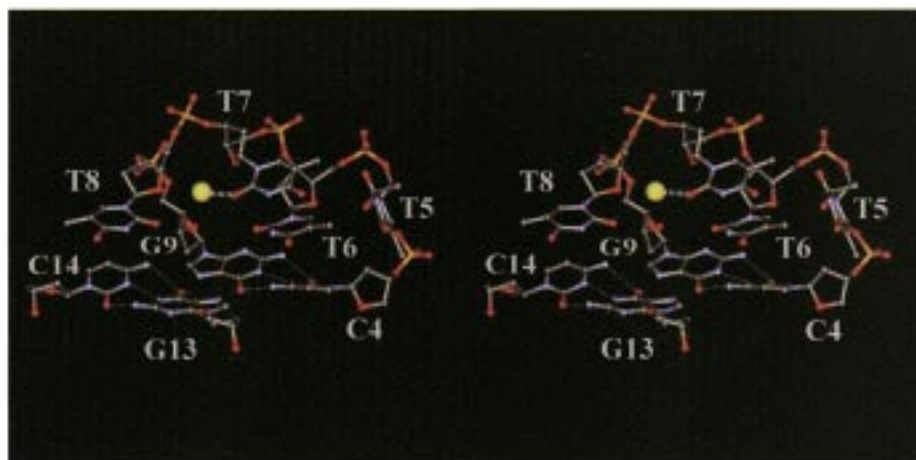

Ion - loop interaction C  
Color coding as above.

The ion resides at the loop apex, interacting with the O2 keto oxygen of residue thymine T7.

## Supplementary material – PDB files

Coordinate files in PDB format for all initial structures utilized in simulations with thymidine loops and for all final structures with thymidine loops. PDB files were submitted via electronic mail to [pdb.ja@acs.org](mailto:pdb.ja@acs.org).

Coordinates are not presented in this printed material.

### Headers of presented PDB files:

REMARK description: initial structure 1A6H (PDB database), ref.9a  
REMARK NMR structure  
REMARK sequence: d(GCGGTTTGCGG)2  
REMARK number of integral cations inside the solute: two  
REMARK PDB format: output from the Carnal module of AMBER5.0

REMARK description: initial structure 1A8N (PDB database), ref.9b  
REMARK NMR structure obtained in presence of NaCl  
REMARK sequence: d(GGGCTTTTGGGC)2  
REMARK number of integral cations inside the solute: three  
REMARK PDB format: output from the Carnal module of AMBER5.0

REMARK description: initial structure 1A8W (PDB database), ref.9c  
REMARK NMR structure obtained in presence of KCl  
REMARK sequence: d(GGGCTTTTGGGC)2  
REMARK number of integral cations inside the solute: five  
REMARK PDB format: output from the Carnal module of AMBER5.0

REMARK description: snapshot from simulation B7L at 10 ns (see Table 1)  
REMARK initial structure for simulation B10L  
REMARK sequence: d(GGGCTTTTGGGC)2  
REMARK number of integral cations inside the solute: three  
REMARK PDB format: output from the Carnal module of AMBER5.0

REMARK name: A7L (see Table 1)  
REMARK description: averaged structure from the interval 1.5-2.5 ns  
REMARK simulation carried out in presence of Na<sup>+</sup>  
REMARK sequence: d(GCGGTTTGCGG)2  
REMARK initial structure: 1A6H (PDB database), two internal cations  
REMARK number of integral cations inside the solute at the end  
REMARK of simulation: two  
REMARK PDB format: output from the Carnal module of AMBER5.0

REMARK name: B3L (see Table 1)  
REMARK description: averaged structure from the interval 3.9-4.9 ns  
REMARK simulation carried out in presence of K<sup>+</sup>  
REMARK sequence: d(GGGCTTTTGGGC)2  
REMARK initial structure: 1A8W (PDB database), five internal cations  
REMARK number of integral cations inside the solute at the end  
REMARK of simulation: three  
REMARK PDB format: output from the Carnal module of AMBER5.0



REMARK name: B4L (see Table 1)  
 REMARK description: averaged structure from the interval 3-4 ns  
 REMARK simulation carried out in presence of Na+  
 REMARK sequence: d(GGGCTTTTGGGC)2  
 REMARK initial structure: 1A8W (PDB database), five internal cations  
 REMARK number of integral cations inside the solute at the end  
 REMARK of simulation: two  
 REMARK PDB format: output from the Carnal module of AMBER5.0

REMARK name: B5L (see Table 1)  
 REMARK description: averaged structure from the interval 4-5 ns  
 REMARK simulation carried out in presence of Na+  
 REMARK sequence: d(GGGCTTTTGGGC)2  
 REMARK initial structure: 1A8N (PDB database), three internal cations  
 REMARK number of integral cations inside the solute at the end  
 REMARK of simulation: three  
 REMARK PDB format: output from the Carnal module of AMBER5.0

REMARK name: B6L (see Table 1)  
 REMARK description: averaged structure from the interval 4-5 ns  
 REMARK simulation carried out in presence of K+  
 REMARK sequence: d(GGGCTTTTGGGC)2  
 REMARK initial structure: 1A8N (PDB database), three internal cations  
 REMARK number of integral cations inside the solute at the end  
 REMARK of simulation: two  
 REMARK PDB format: output from the Carnal module of AMBER5.0

REMARK name: B7L (see Table 1)  
 REMARK description: averaged structure from the interval 11-12 ns  
 REMARK simulation carried out in presence of K+  
 REMARK sequence: d(GGGCTTTTGGGC)2  
 REMARK initial structure: 1A8W (PDB database), five internal cations  
 REMARK number of integral cations inside the solute at the end  
 REMARK of simulation: three  
 REMARK PDB format: output from the Carnal module of AMBER5.0

REMARK name: B8L (see Table 1)  
 REMARK description: averaged structure from the interval 9-10 ns  
 REMARK simulation carried out in presence of Na+  
 REMARK sequence: d(GGGCTTTTGGGC)2  
 REMARK initial structure: 1A8W (PDB database), five internal cations  
 REMARK number of integral cations inside the solute at the end  
 REMARK of simulation: two  
 REMARK PDB format: output from the Carnal module of AMBER5.0

REMARK name: B9L (see Table 1)  
 REMARK description: averaged structure from the interval 4-5 ns  
 REMARK simulation carried out in presence of K+  
 REMARK sequence: d(GGGCTTTTGGGC)2  
 REMARK initial structure: 1A8W (PDB database), five internal cations  
 REMARK number of integral cations inside the solute at the end  
 REMARK of simulation: three  
 REMARK PDB format: output from the Carnal module of AMBER5.0

REMARK name: B10L (see Table 1)  
REMARK description: averaged structure from the interval 2.5-3.0 ns  
REMARK simulation carried out in presence of K+  
REMARK sequence: d(GGGCTTTTGGGC)2  
REMARK initial structure: snapshot from simulation B7L at 10 ns  
REMARK number of integral cations inside the solute at the end  
REMARK of simulation: three  
REMARK PDB format: output from the Carnal module of AMBER5.0

REMARK name: B11L (see Table 1)  
REMARK description: averaged structure from the interval 4-5 ns  
REMARK simulation carried out in presence of Na+ (high salt concentration)  
REMARK sequence: d(GGGCTTTTGGGC)2  
REMARK initial structure: 1A8W (PDB database), five internal cations  
REMARK number of integral cations inside the solute at the end  
REMARK of simulation: two  
REMARK PDB format: output from the Carnal module of AMBER5.0
